# Supplementary material for: High multiplicity of infection following transplantation of hepatitis C virus–positive organs
Source: JCI journal article supplement (doi:10.1172/jci127203), 2019-05-21
Supplement: sd1 [file 1]

## Supplemental Data

**Figure S1. Highlighter plot of 5' half genome sequences from Donor A, Recipient AK1, and Recipient AK2**

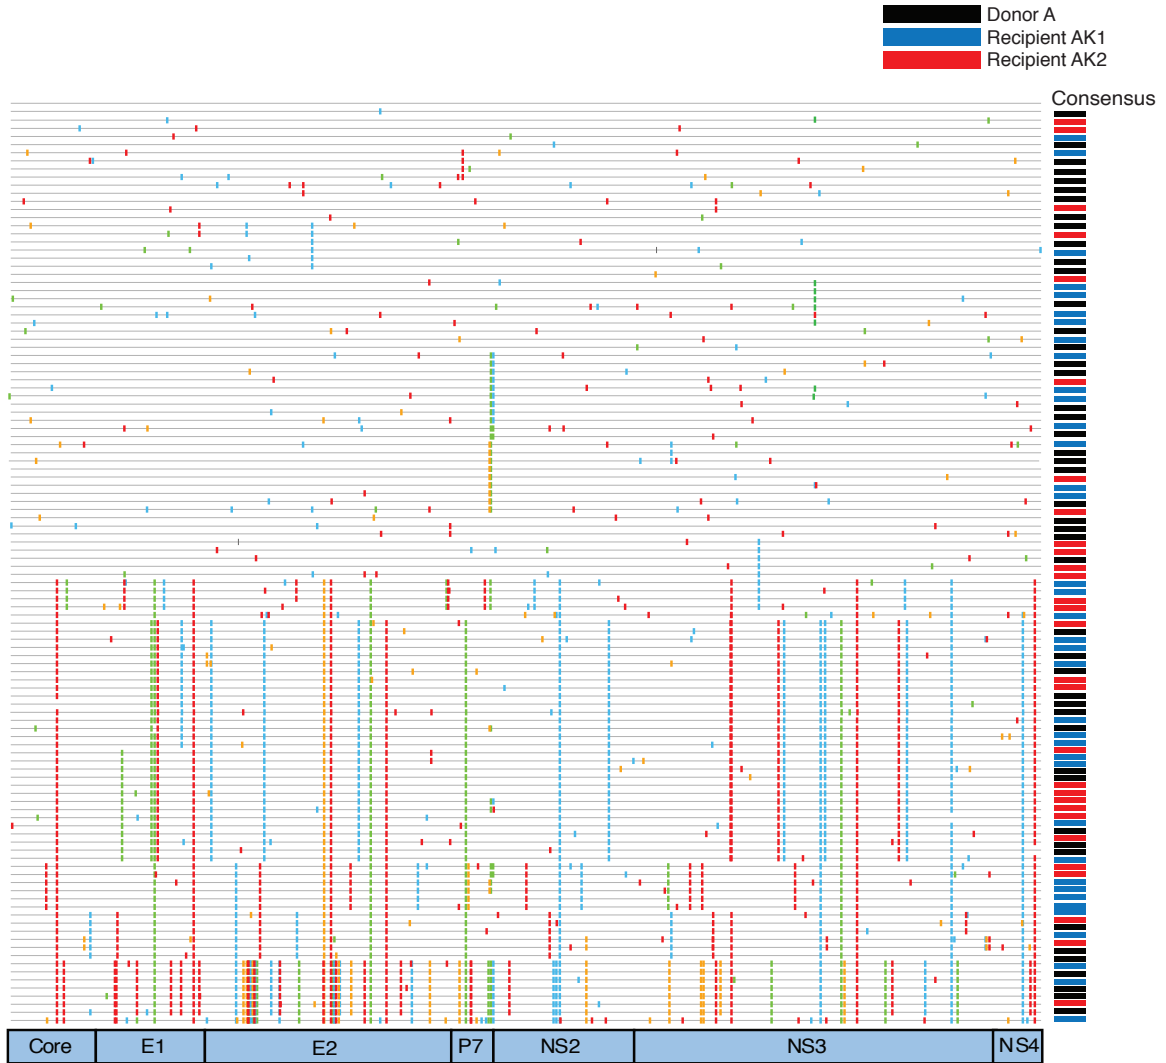

**Figure S1.** The consensus of all displayed sequences is shown at the top, with individual sequences displayed as horizontal lines below, labeled by color-coded bars. Each nucleotide difference from the consensus sequence is shown as a colored tic (green: A, red: T, blue: C, yellow: G). Viral sequences from the donor and two recipients are interspersed throughout the lineages.

**Figure S2. Highlighter plot of 5' half genome sequences from Donor D and the Donor D 'deleted lineage'**

A.

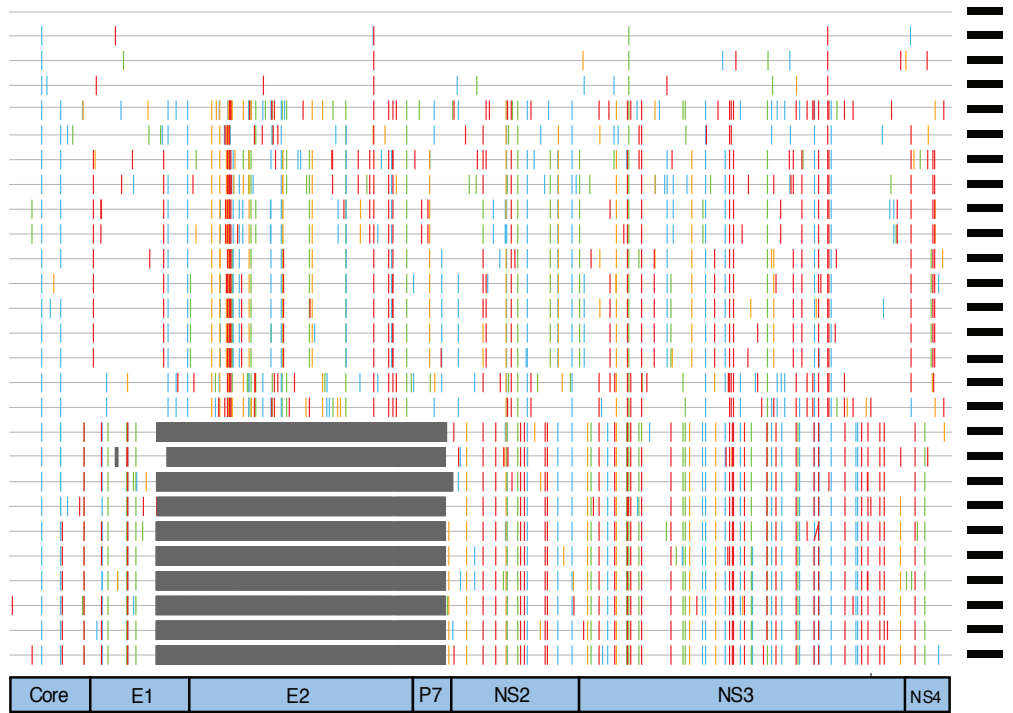

B.

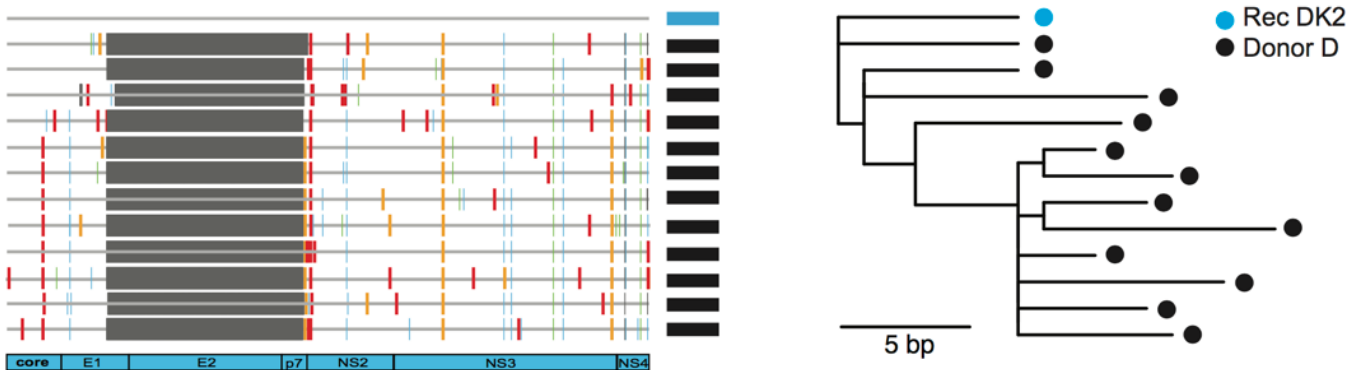

**Figure S2.** Highlighter plot of 5' half genome sequences from Donor D (A), demonstrating the lineage with E1E2 deletion. Highlighter plot and phylogenetic tree (B) of the deleted lineage from Donor D and Recipient DK2. Notably, the sequence from Recipient DK2 encodes an intact 5' half genome.

**Table S1. Geneological Sorting Indices**

GSI value (p value) are presented comparing sequences from the indicated donor to the indicated recipient across each row.

| <b>Donor</b><br><b>GSI value (p value)</b>                           | <b>Recipient</b><br><b>GSI value (p value)</b>                     |
|----------------------------------------------------------------------|--------------------------------------------------------------------|
| <u>Donor A</u><br>0.151 (p=0.144)                                    | <u>Rec AK1</u><br>0.060 (p=0.962)                                  |
| <u>Donor A</u><br>0.113 (p=0.401)                                    | <u>Rec AK2</u><br>0.071 (p=0.978)                                  |
| <u>Donor B</u><br>0.115 (p=0.494)                                    | <u>Rec BK</u><br>0.165 (p=0.080)                                   |
| <u>Donor C</u><br>0.109 (p=0.563)                                    | <u>Rec CK</u><br>0 (p=1)                                           |
| <u>Donor D</u><br>0.225 ( <b>p=0.014</b> )*                          | <u>Rec DK1</u><br>0.271 ( <b>p=0.001</b> )*                        |
| <u>Donor D</u><br>0.453 ( <b>p=0.0001</b> )*                         | <u>Rec DK2</u><br>0.248 ( <b>p=0.0096</b> )*                       |
| <u>Donor D</u><br>0.212 (p=0.089)                                    | <u>Rec DH</u><br>0 (p=1)                                           |
| <u>Donor D (excluding E1E2-deleted sequences)</u><br>0.116 (p=0.743) | <u>Rec DK1 (excluding E1E2-deleted sequences)</u><br>0 (p=1)       |
| <u>Donor D (excluding E1E2-deleted sequences)</u><br>0.186 (p=0.165) | <u>Rec DK2 (excluding E1E2-deleted sequences)</u><br>0.066 (0.592) |
| <u>Donor D (excluding E1E2-deleted sequences)</u><br>0.2 (p=0.3167)  | <u>Rec DH (excluding E1E2-deleted sequences)</u><br>0 (p=1)        |

The GSI tests the phylogenetic similarities of two sequence groups with the null hypothesis that the virus populations were the same; GSI values range from 0 (complete interspersions) to 1 (complete monophyly) with statistical significance indicating greater than random segregation between groups.

**Table S2. Donor Clinical Data**

| <b>Donor ID</b> | <b>Sex</b> | <b>Ethnicity</b> | <b>Age (years)</b> | <b>Risk for HCV</b> | <b>HCV genotype</b> | <b>Reported mechanism and cause of death</b> |
|-----------------|------------|------------------|--------------------|---------------------|---------------------|----------------------------------------------|
| <b>A</b>        | Male       | Caucasian        | 46                 | Injection drug use  | 1a                  | Cardiovascular; Anoxia                       |
| <b>B</b>        | Male       | Caucasian        | 25                 | Injection drug use  | 1a                  | Drug intoxication; Anoxia                    |
| <b>C</b>        | Male       | Caucasian        | 29                 | Injection drug use  | 1a                  | Drug intoxication; Anoxia                    |
| <b>D</b>        | Male       | Caucasian        | 37                 | Injection drug use  | 1a                  | Drug intoxication; Anoxia                    |

## Supplemental Methods.

**Sequencing primers.** The primers were as follows: (i) first-round sense primer 1aCore.F1 (5'-ATGAGCACGAATCCTAAACCTCAAAGA-3'; nucleotides [nt] 342-368, H77), (ii) first-round antisense primer 1aNS4A.R1 (5'-GCACTCTTCCATCTCATCGAACTC-3'; nt 5451-5474, H77), (iii) second-round sense primer 1aCore.F2 (5'-TCAAAGAAAAACCAAACGTAACACCAACCG-3'; nt 362-391, H77), (iv) second-round antisense primer 1aNS4A.R2 (5'-AGGTGCTCGTGACGACCTCCAGG-3'; nt 5297-5319, H77)

**Geneological Sorting Indices.** To assess similarities between sampled virus populations, within-person maximum likelihood phylogenies of combinations of donor and recipient sequences were inferred using PhyML version 3.0 and GSI values were calculated using the geneological Sorting R package (<http://molecularevolution.org/software/phylogenetics/gsi/download>) (27). Statistical significance was assessed by randomly permuting character states across the tips of the tree 10,000 times. Non-significant values indicate the absence of compartmentalization (p values were corrected for multiple tests).
